# Supplementary material for: Detection of Recombinant Proteins SOX2 and OCT4 Interacting in HEK293T Cells Using Real-Time Quantitative PCR
Source: MDPI journal article supplement (doi:10.3390/life13010107), 2022-12-30
Supplement: s1 [file s1]

# Detection of Recombinant Proteins SOX2 and OCT4 Interacting in HEK293T Cells Using Real-Time Quantitative PCR

Darkhan Kanayev, Diana Abilmazhenova, Ilyas Akhmetollayev, Alia Sekenova, Vyacheslav Ogay and Arman Kulyyassov\*

<sup>1</sup> Limited liability partnership “National Center for Biotechnology” Ministry of Healthcare of the Republic of Kazakhstan, 3/5, Kurgalzhynskoye Road , Astana, 010000, Kazakhstan  
\* Correspondence: kulyyassov@biocenter.kz; Tel.: +7-7172-707534

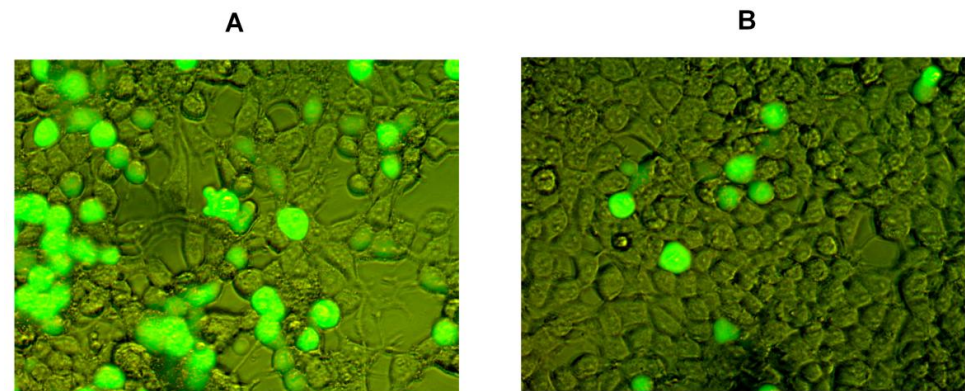

**Figure S1.** Comparison of expression of eGFP under strong CMV (A) and weak MoMuLV (B) promoters. HEK293T cells were transfected by corresponding plasmids (CMV-BirA-GFP or MoMuLV-BirA-GFP) using Lipofectamine.

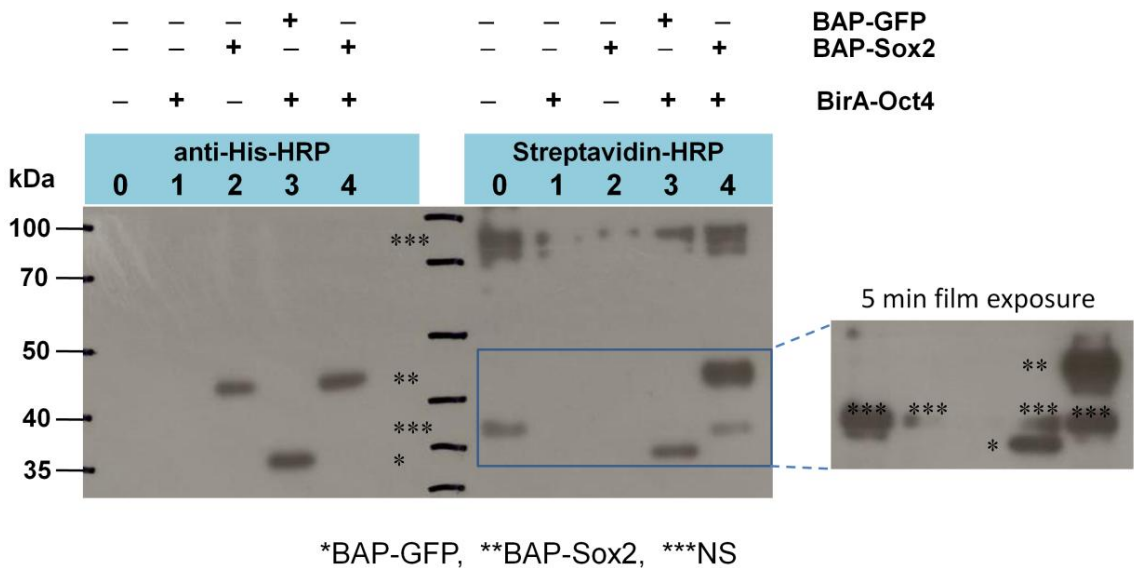

**Figure S2.** Experiment with additional controls for testing specificity of biotinylation. Sample 0 – no plasmid were added to the cells. BirA-OCT4 and BAP-SOX2 were expressed separately in samples 1 and 2 correspondingly. Biotin labeling time was 9h. The positions of the BAP-fusions and nonspecific signals (NS) are indicated as asterisks. No biotinylation bands except nonspecific bindings were observed in lines 0-2. Biotinylation level of BAP-SOX2 in sample 4 is much higher than BAP-GFP in sample 3. No biotinylation was observed in case of separate BAP-SOX2 or BirA-OCT4 expressions (lanes 1 and 2 on streptavidin blot).

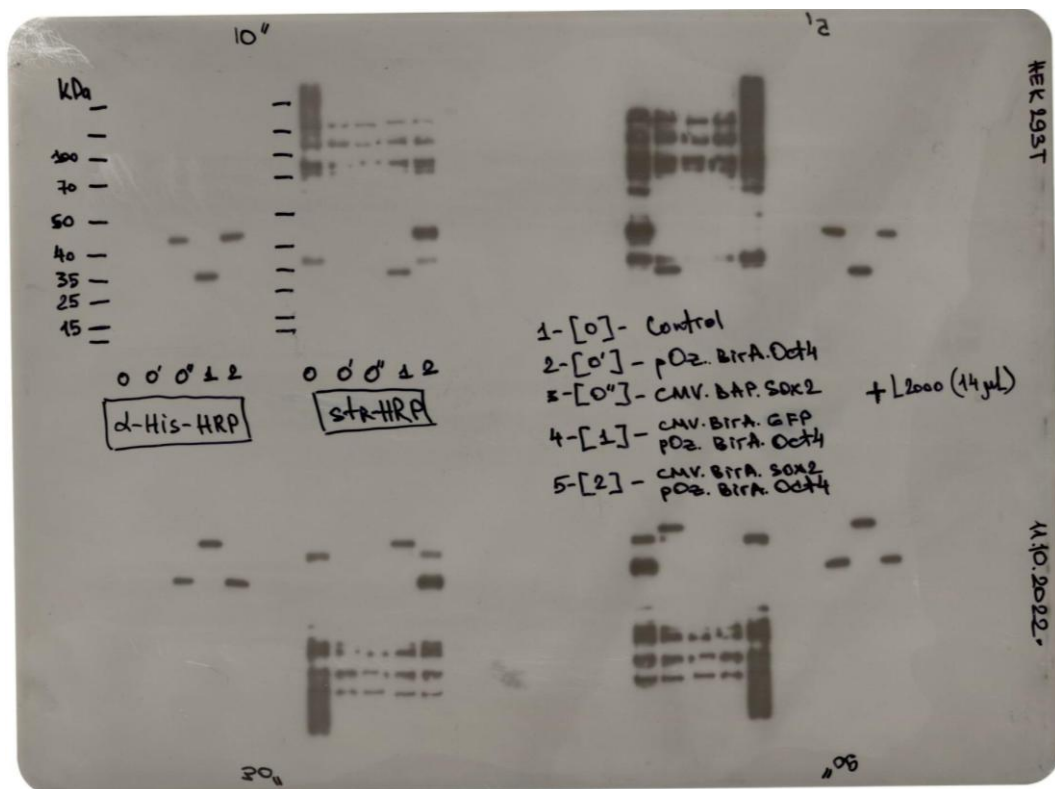

**Figure S3.** Uncropped blot from [Figure S2](#). Testing the specificity of biotinylation for BAP/BirA pair in HEK293T cells. Time of film exposure: 10 sec, 30, sec, 90 sec and 5 min.

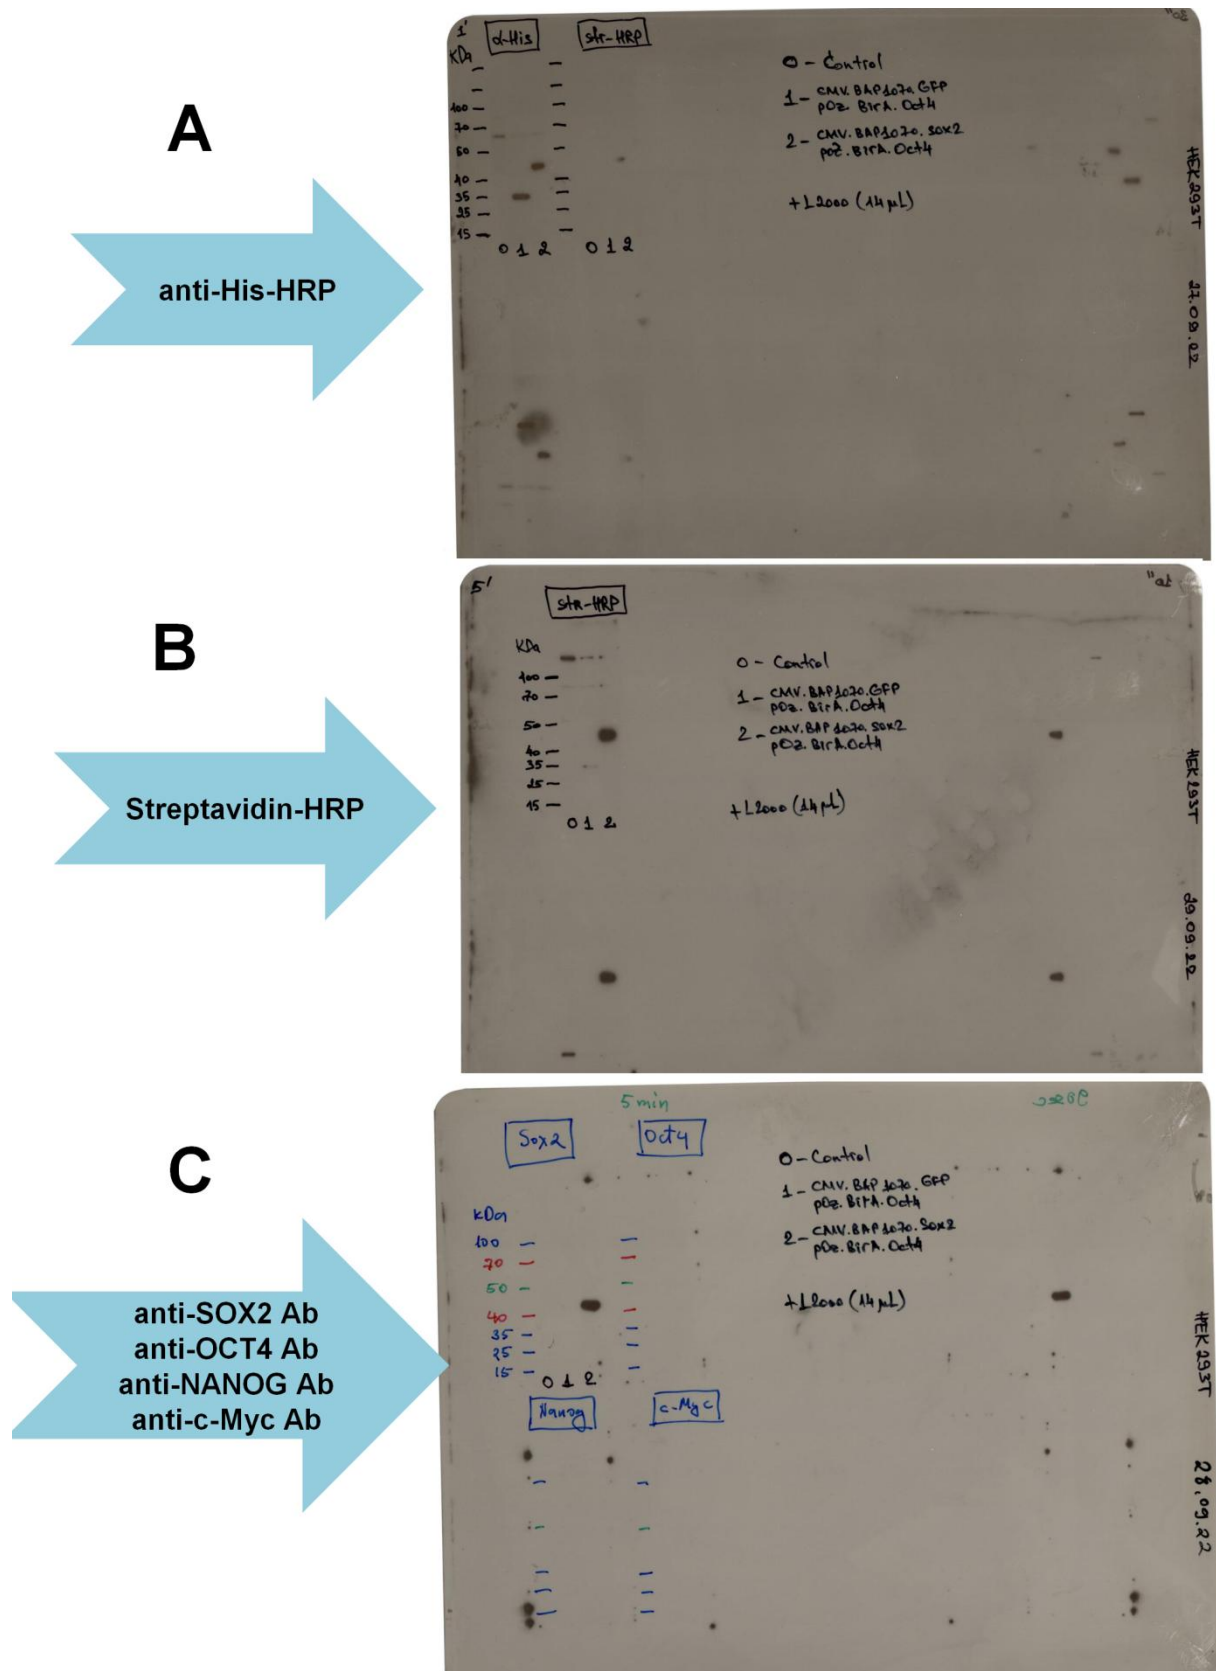

**Figure S4.** Uncropped blot from [Figure 1B](#) of manuscript. Sample 0 – nontransfected cells, sample 1 - BAP-GFP+BirA-OCT4, sample 2 - BAP-SOX2+BirA-OCT4. (A) anti-His antibody. (B) Streptavidin-HRP conjugate. (C) Checking the level of expression of endogenous SOX2, OCT4, NANOG and c-Myc proteins in cells.

A

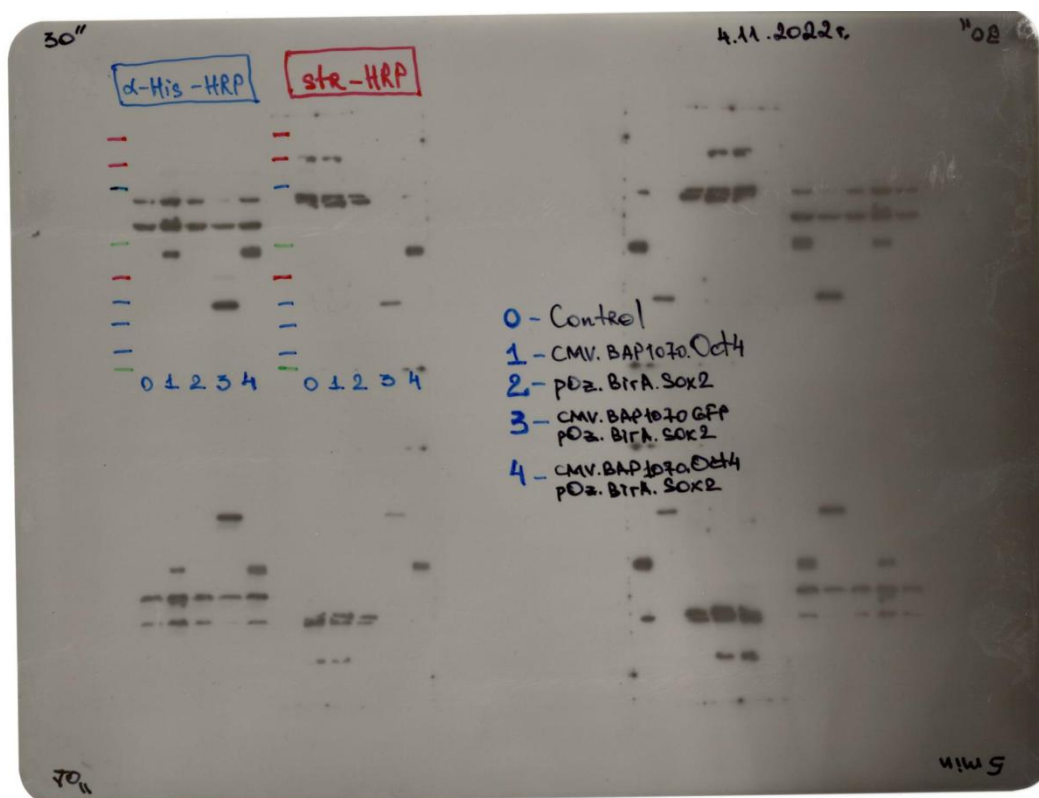

B

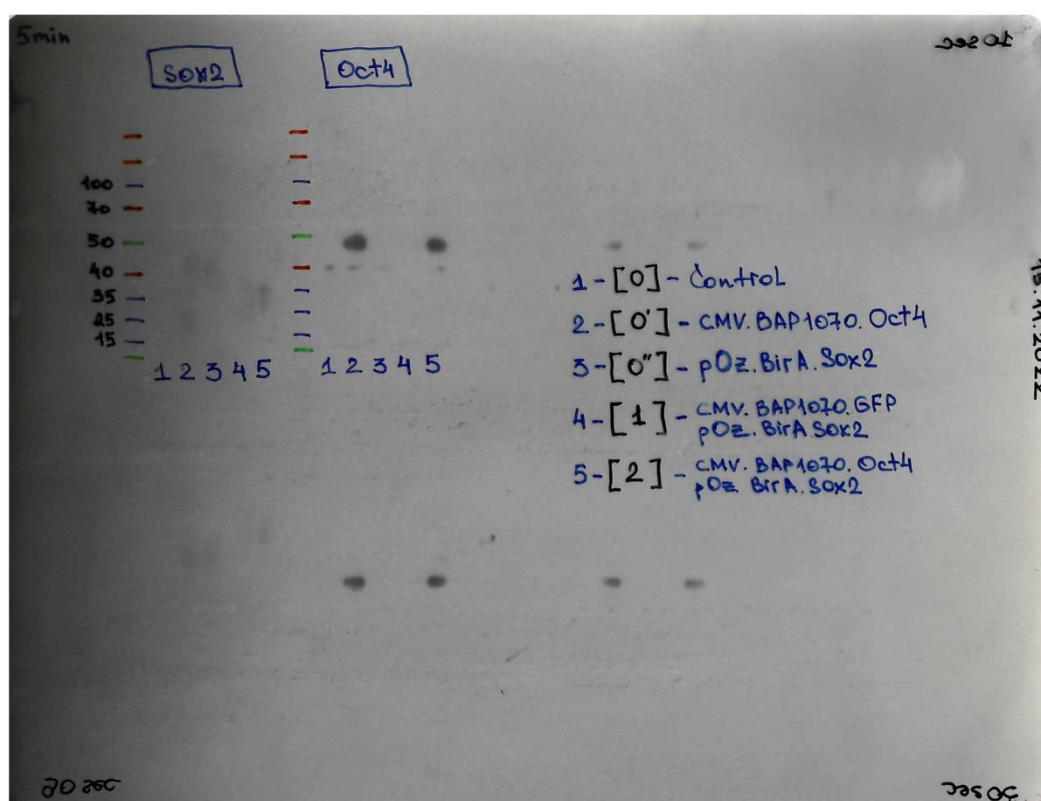

**Figure S5.** Uncropped blot from [Figure 1C](#) of manuscript (Reciprocal experiment). Sample 0 – nontransfected cells, sample 1 - BAP-OCT4 alone, sample 2 - BirA-SOX2 alone, sample 3 - BAP-GFP+BirA-SOX2, sample 4 – BAP-OCT4 +BirA-SOX2. (A) anti-His antibody and Streptavidin-HRP conjugate. (B) Checking the level of expression of endogenous SOX2 and OCT4 proteins in cells.

## Real time quantitative RT PCR

**Table S1.** List of Gene Primers (the Forward and Reverse Sequences and TaqMan probes), Annealing Conditions, and Region of Amplification for the RT PCR.

| No | Gene | Sequence 5'-3'                                                          | Annealing temperature °C | Primer concentration $\mu$ M | NCBI accession ID |
|----|------|-------------------------------------------------------------------------|--------------------------|------------------------------|-------------------|
| 1  | ACTB | TCACCATTGGCAATGAG<br>CCACGTCACACTTCATG<br>ROX-ACTCTTCCAGCCTTCCTTCC-BHQ2 | 58                       | 0.5                          | NM_001101         |
| 2  | SOX2 | CTCCGGGACATGATCAGC<br>CTGGGACATGTGAAGTCTGC<br>FAM-TTCCGGCACCTCGGCG-BHQ1 | 64                       | 0.5                          | NM_003106         |
| 3  | OCT4 | GGGTTCTATTTGGAAGG<br>TCCTGAAGATTTTCATGTTG<br>FAM-ACGACCATCTGCCGCT-BHQ1  | 58                       | 0.5                          | NM_001173531      |

- a. The  $\Delta C_T$  value is determined by subtracting the average OCT4  $C_T$  value from the average Housekeeping (Actin)  $C_T$  value.

$$\Delta C_T = C_{T,target} - C_{T,housekeeping}$$

The standard deviation of the difference is calculated from the standard deviations of the target and housekeeping values.  $s = \sqrt{s_{target}^2 + s_{housekeeping}^2}$

- b. The calculation of  $\Delta\Delta C_T$  involves subtraction by the  $\Delta C_T$  calibrator value (control).

$\Delta\Delta C_T = \Delta C_{T,sample} - \Delta C_{T,control}$  This is subtraction of an arbitrary constant, so the standard deviation of  $\Delta\Delta C_T$  is the same as the standard deviation of the  $\Delta C_T$  value.

- c. The range given for the expression of target gene relative to Sample 0 is determined by evaluating the expression:  $2^{\Delta\Delta C_T}$  with  $\Delta\Delta C_T + s$  and  $\Delta\Delta C_T - s$ , where  $s$  = the standard deviation of the  $\Delta\Delta C_T$  value.

**Table S2.** Calculation of OCT4 expression in samples 0-2.

| Sample   | Housekeeping<br>(Actin)<br>Average C <sub>t</sub> | OCT4<br>Average C <sub>T</sub> | ΔC <sub>T</sub> | ΔΔC <sub>T</sub> | OCT4<br>Rel. to Sample 0                                               |
|----------|---------------------------------------------------|--------------------------------|-----------------|------------------|------------------------------------------------------------------------|
| Sample 0 | 23,75 ± 0,04                                      | 40,00 ± 0,00                   | 16,25 ± 0,04    | 0,00 ± 0,04      | 1,00<br>(0,97 – 1,03)                                                  |
| Sample 1 | 24,22 ± 0,47                                      | 19,17 ± 0,14                   | -5,05 ± 0,49    | -21,30 ± 0,49    | 2,58×10 <sup>6</sup><br>(1,84×10 <sup>6</sup> – 3,63×10 <sup>6</sup> ) |
| Sample 2 | 24,79 ± 0,36                                      | 18,31 ± 0,22                   | -6,48 ± 0,42    | -22,73 ± 0,42    | 6,98×10 <sup>6</sup><br>(5,23×10 <sup>6</sup> – 9,31×10 <sup>6</sup> ) |

**Table S3.** Calculation of SOX2 expression in samples 0-2.

| Sample   | Housekeeping<br>(Actin)<br>Average C <sub>t</sub> | SOX2<br>Average C <sub>T</sub> | ΔC <sub>T</sub> | ΔΔC <sub>T</sub> | SOX2<br>Rel. to Sample 0                                               |
|----------|---------------------------------------------------|--------------------------------|-----------------|------------------|------------------------------------------------------------------------|
| Sample 0 | 23,75 ± 0,04                                      | 40,00 ± 0,00                   | 16,25 ± 0,04    | 0,00 ± 0,04      | 1,00<br>(0,97 – 1,03)                                                  |
| Sample 1 | 24,22 ± 0,47                                      | 40,00 ± 0,00                   | 15,78 ± 0,47    | -0,47 ± 0,47     | 1,38<br>(1,00 – 1,92)                                                  |
| Sample 2 | 24,79 ± 0,36                                      | 17,14 ± 0,39                   | -7,65 ± 0,53    | -23,91 ± 0,53    | 1,57×10 <sup>7</sup><br>(1,09×10 <sup>7</sup> – 2,27×10 <sup>7</sup> ) |

**A**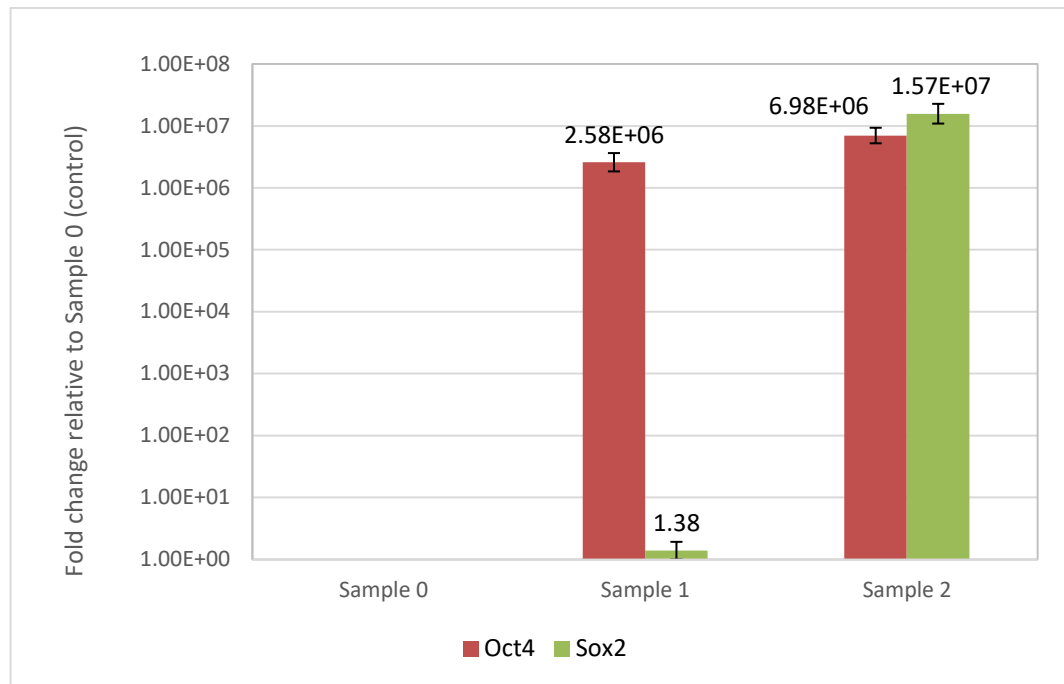**B**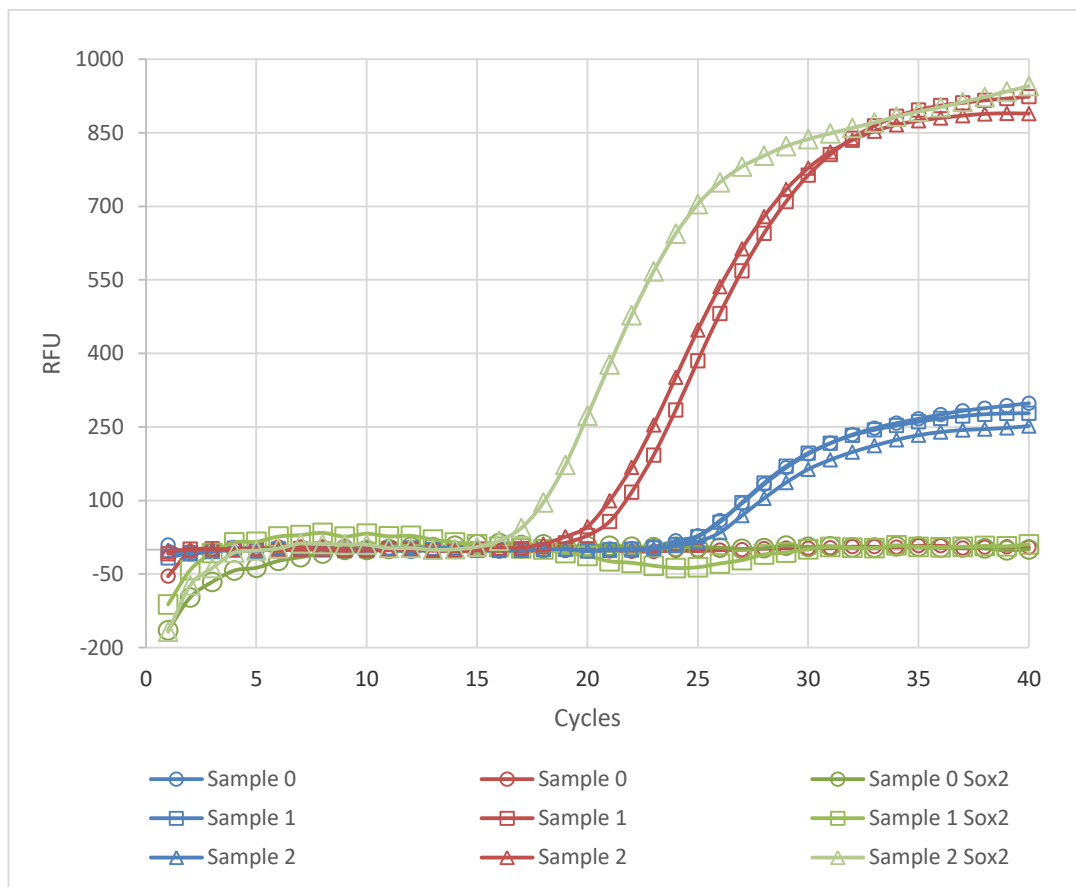

**Figure S6.** Bar chart diagram and overlay of amplification plots for samples 0-2. Sample 0 (control without plasmids), Sample 1 (BAP-GFP + BirA-OCT4), Sample 2 (BAP-SOX2 + BirA-OCT4): (A) Relative normalized expression of target genes; (B) real-time PCR amplification curves



**Table S4.** Calculation of OCT4 expression in samples 0'-2'.

| Sample    | Housekeeping<br>(Actin)<br>Average C <sub>t</sub> | OCT4<br>Average C <sub>T</sub> | ΔC <sub>T</sub> | ΔΔC <sub>T</sub> | OCT4<br>Rel. to Sample 0'                                                 |
|-----------|---------------------------------------------------|--------------------------------|-----------------|------------------|---------------------------------------------------------------------------|
| Sample 0' | 20,28 ± 0,33                                      | 40,00 ± 0,00                   | 29,72 ± 0,33    | 0,00 ± 0,33      | 1,00<br>(0,79 – 1,26)                                                     |
| Sample 1' | 21,05 ± 1,25                                      | 40,00 ± 0,00                   | 28,95 ± 1,25    | -0,77 ± 1,25     | 1,70<br>(0,72 – 4,03)                                                     |
| Sample 2' | 20,75 ± 0,87                                      | 15,88 ± 0,17                   | -4,87 ± 0,88    | -34,58 ± 0,88    | 2,57×10 <sup>10</sup><br>(1,39×10 <sup>10</sup> – 4,74×10 <sup>10</sup> ) |

**Table S5.** Calculation of SOX2 expression in samples 0'-2'.

| Sample    | Housekeeping<br>(Actin)<br>Average C <sub>t</sub> | SOX2<br>Average C <sub>T</sub> | ΔC <sub>T</sub> | ΔΔC <sub>T</sub> | SOX2<br>Rel. to Sample 0                                               |
|-----------|---------------------------------------------------|--------------------------------|-----------------|------------------|------------------------------------------------------------------------|
| Sample 0' | 20,28 ± 0,33                                      | 40,00 ± 0,00                   | 29,72 ± 0,33    | 0,00 ± 0,33      | 1,00<br>(0,79 – 1,26)                                                  |
| Sample 1' | 21,05 ± 1,25                                      | 20,51 ± 0,53                   | -0,04 ± 0,75    | -29,76 ± 0,75    | 9,08×10 <sup>8</sup><br>(5,38×10 <sup>8</sup> – 1,53×10 <sup>9</sup> ) |
| Sample 2' | 20,75 ± 0,87                                      | 18,29 ± 0,24                   | -2,46 ± 0,90    | -32,18 ± 0,90    | 4,85×10 <sup>9</sup><br>(2,60×10 <sup>9</sup> – 9,04×10 <sup>9</sup> ) |



**A**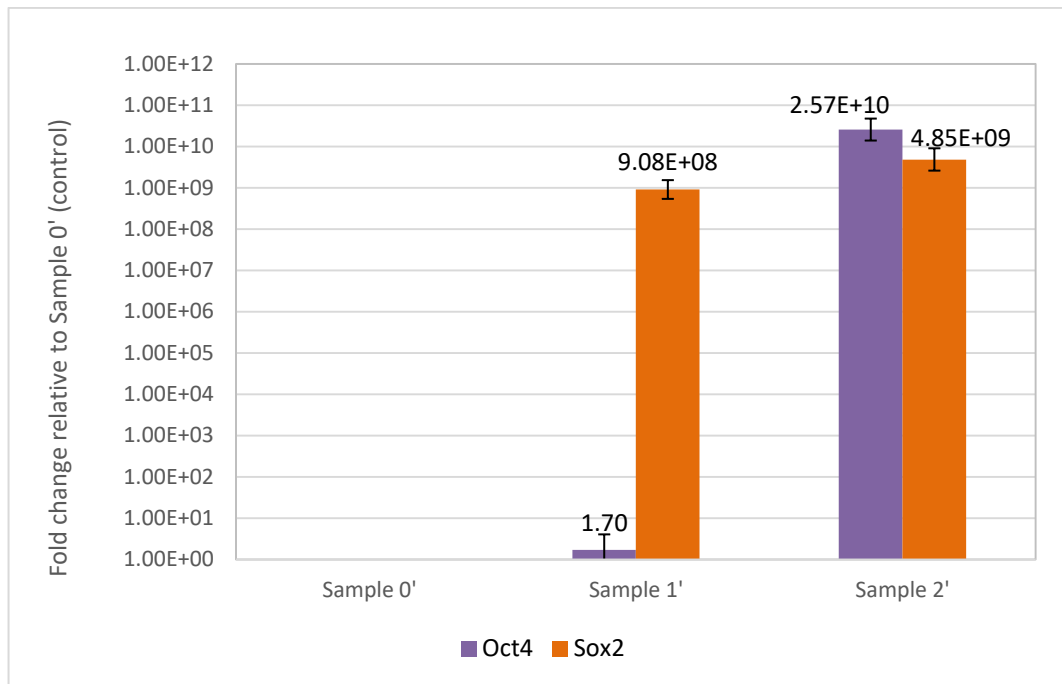**B**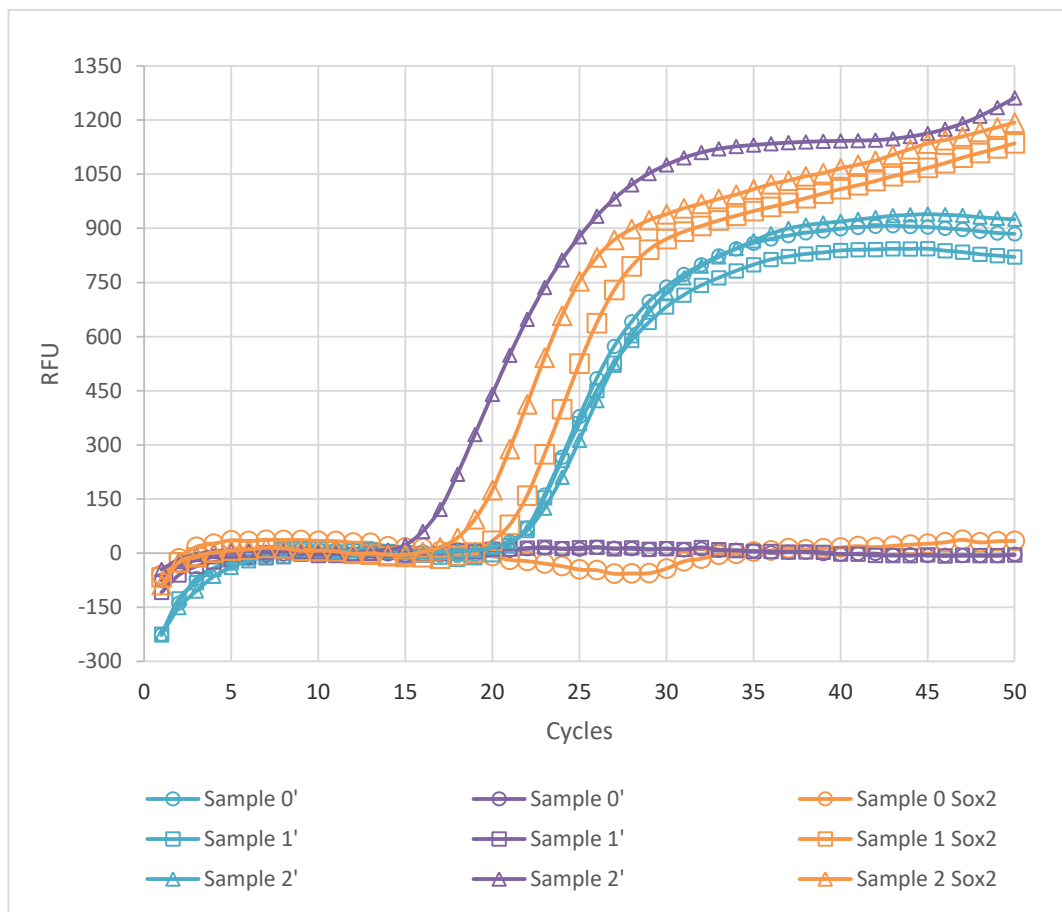

**Figure S7.** Bar chart diagram and overlay of amplification plots for samples 0'-2'. Sample 0' (control without plasmids), Sample 1' (BAP-GFP + BirA-SOX2), Sample 2 (BAP-OCT4 + BirA-SOX2): (A) Relative normalized expression of target genes; (B) real-time PCR amplification curves.
